# Supplementary material for: Heterostructure engineering of Co-doped MoS2 coupled with Mo2CTx MXene for enhanced hydrogen evolution in alkaline media
Source: Royal Society of Chemistry journal article supplement (doi:10.1039/c9nr02085c), 2019-01-01
Supplement: c9nr02085c1.pdf [file c9nr02085c1.pdf]

**Heterostructures Engineering of Co doped MoS<sub>2</sub> coupling with  
Mo<sub>2</sub>CT<sub>x</sub> MXene for Enhanced Hydrogen Evolution in Alkaline Media**

Junmei Liang, Chaoying Ding, Jiapeng Liu, Tao Chen, WenChao Peng, Yang Li, Fengbao Zhang  
and Xiaobin Fan\*

School of Chemical Engineering and Technology, State Key Laboratory of Chemical Engineering,  
Collaborative Innovation Center of Chemical Science and Engineering, Tianjin University, Tianjin  
300072, China

E-mail: xiaobinfan@tju.edu.cn

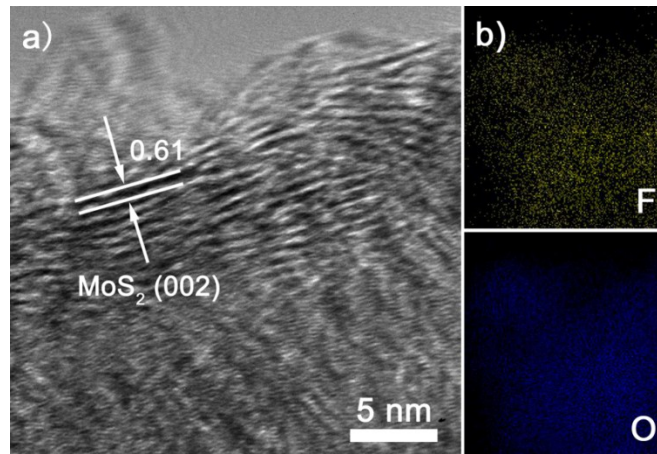

**Figure S1** a) HRTEM image of pristine MoS<sub>2</sub>; b) elemental mapping showing the uniform distribution of F and O elements in Co-MoS<sub>2</sub>/Mo<sub>2</sub>CT<sub>x</sub> nanohybrids.

The following simplified reactions occurs when the exfoliation of M<sub>n+1</sub>AX<sub>n</sub> phase by HF solution, the as-obtained pristine MXene are chemically terminated with oxygen-containing and/or fluoride functional groups. Thus, the negatively charged terminal groups (–F and –O) can be detected by elemental mapping.

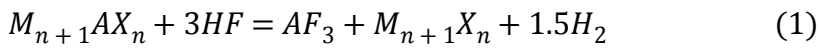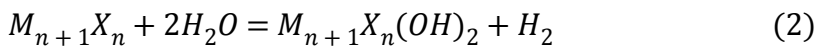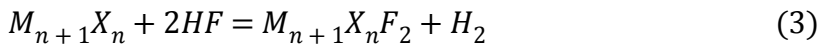

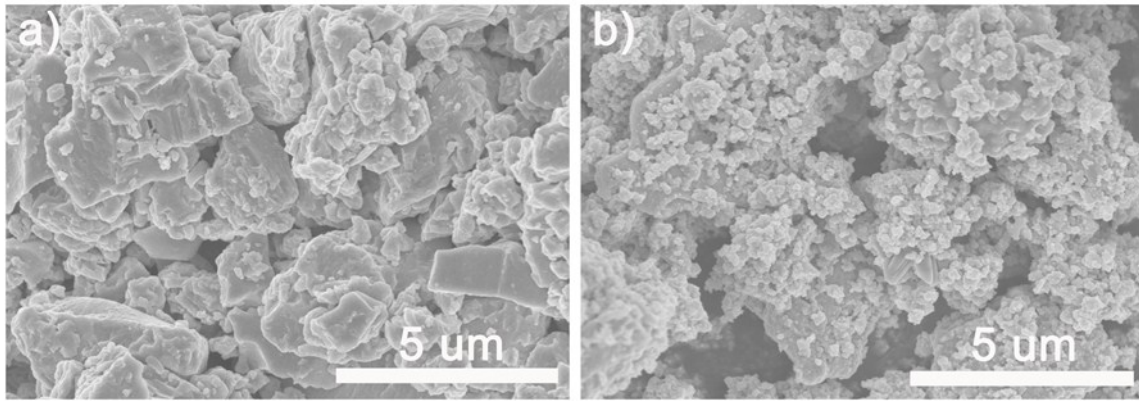

**Figure S2** SEM images of a) pure MoS<sub>2</sub> and b) Co-MoS<sub>2</sub>/Mo<sub>2</sub>CT<sub>x</sub> nanohybrids.

The SEM images of pure MoS<sub>2</sub> and Co-MoS<sub>2</sub>/Mo<sub>2</sub>CT<sub>x</sub> nanohybrids have been shown in Figure S2. The pure MoS<sub>2</sub> in Figure S2a shows the large bulk morphology, while the Co-MoS<sub>2</sub>/Mo<sub>2</sub>CT<sub>x</sub> nanohybrid in Figure S2b exhibits dispersed MoS<sub>2</sub> particles attached on the surface of Mo<sub>2</sub>CT<sub>x</sub> MXene. This result further confirms the Mo<sub>2</sub>CT<sub>x</sub> MXene can prevent MoS<sub>2</sub> particles from agglomeration during preparation progress. The corresponding modification is also made in original manuscript.

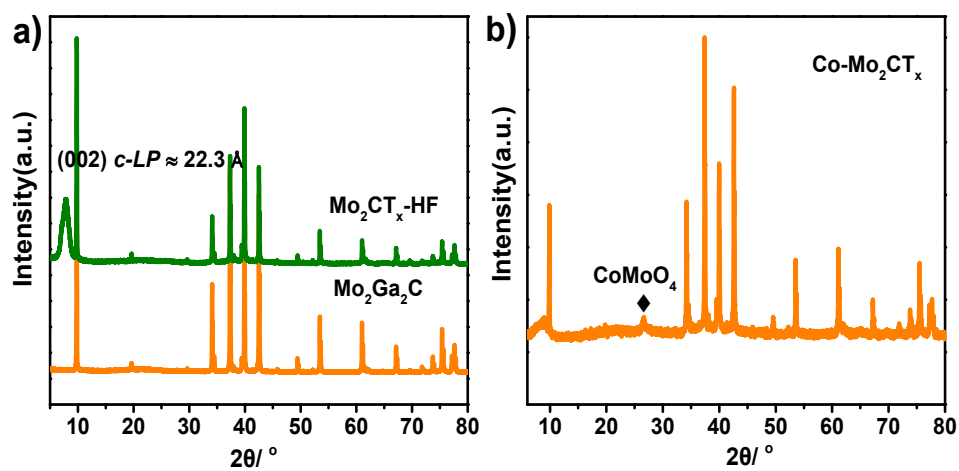

**Figure S3** a) XRD patterns of  $\text{Mo}_2\text{CT}_x$  MXene by HF etching without annealing in Ar atmosphere and pristine  $\text{Mo}_2\text{Ga}_2\text{C}$ ; b) XRD pattern of  $\text{Co-Mo}_2\text{CT}_x$  sample.

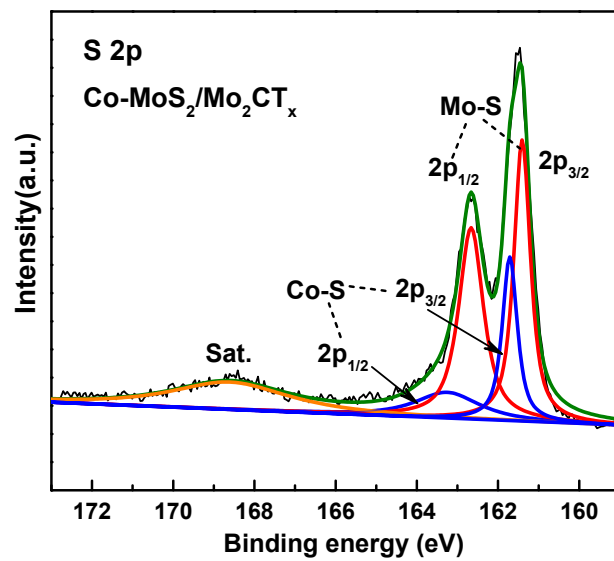

**Figure S4** XPS spectrum of S 2p in Co-MoS<sub>2</sub>/Mo<sub>2</sub>CT<sub>x</sub> hybrid.

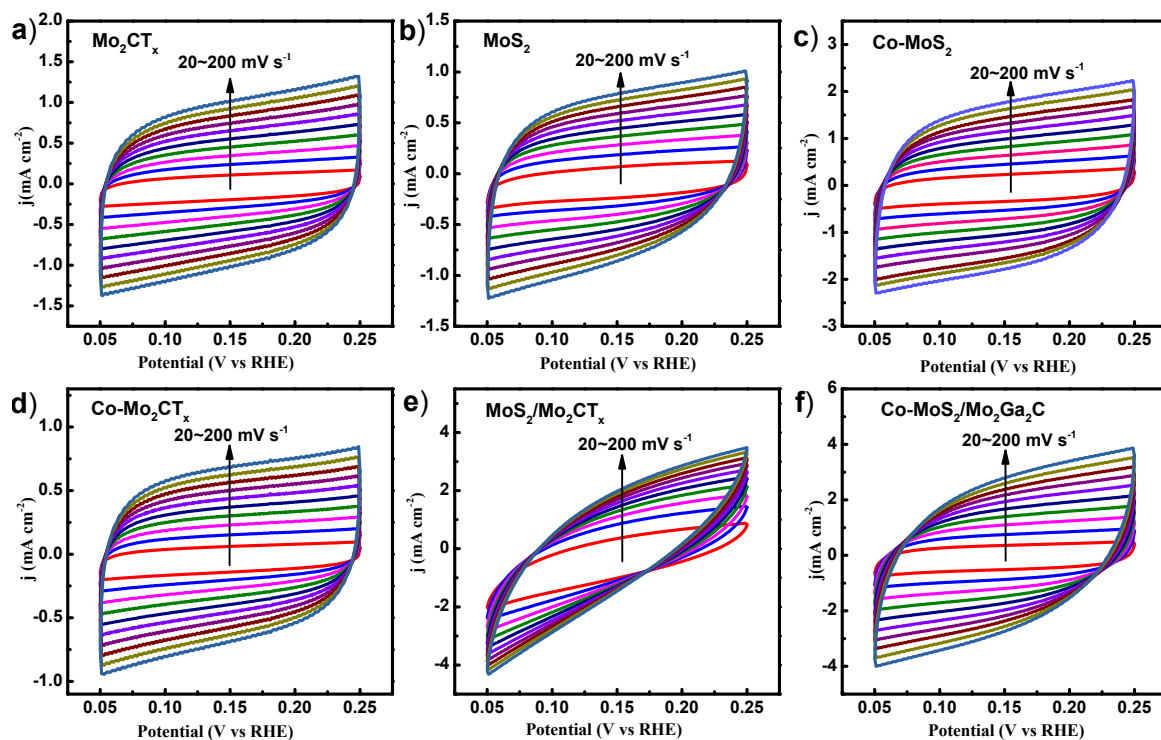

**Figure S5** Cyclic voltammograms for different materials at the different rates range from 20 to 200  $\text{mV s}^{-1}$ .

To evaluate the electrochemically active surface area (ECSA), a series of cyclic voltammetry (CV) measurements were performed at different scan rates varying from 20 to 200  $\text{mV s}^{-1}$  in the region from 0.05 to 0.25 V to determine the double-layer capacitance ( $C_{dl}$ ). For comparison, the CV at different scan rates of Co-MoS<sub>2</sub>/Mo<sub>2</sub>Ga<sub>2</sub>C catalyst was performed. The results are shown in **Figure S5**.

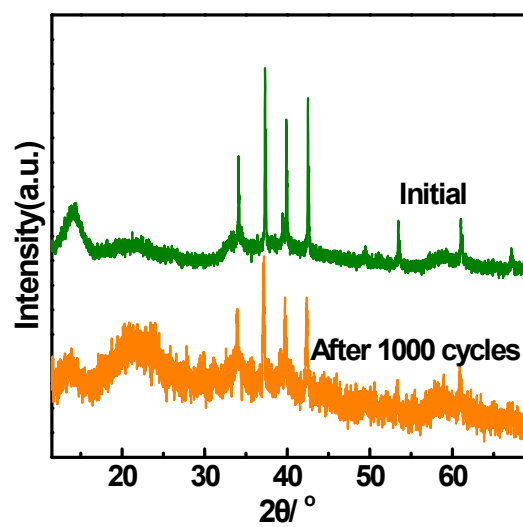

**Figure S6** XRD patterns of Co-MoS<sub>2</sub>/Mo<sub>2</sub>CT<sub>x</sub> catalyst before and after stability test.

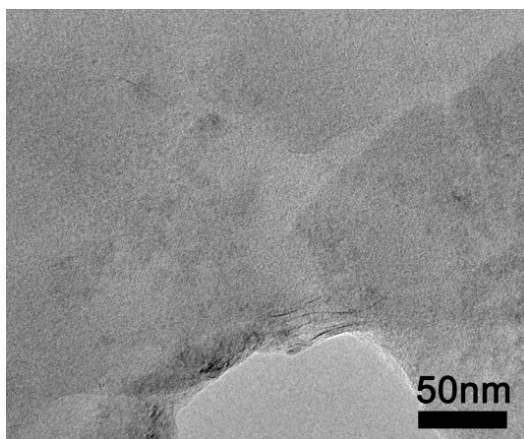

**Figure S7** TEM image of Co-MoS<sub>2</sub>/Mo<sub>2</sub>CT<sub>x</sub> after stability test.



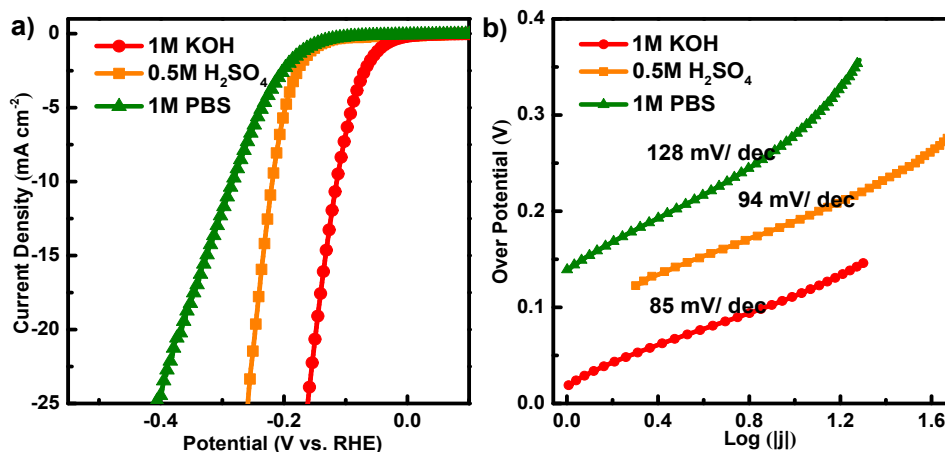

**Figure S8** a) Polarization curves of Co-MoS<sub>2</sub>/Mo<sub>2</sub>CT<sub>x</sub> in 1M KOH, 0.5 M H<sub>2</sub>SO<sub>4</sub> and 1M PBS electrolytes and b) the corresponding Tafel plots.

The HER performance of Co-MoS<sub>2</sub>/Mo<sub>2</sub>CT<sub>x</sub> electrode in acid and neutral media were evaluated and the results are compared in Figure S8. The Co-MoS<sub>2</sub>/Mo<sub>2</sub>CT<sub>x</sub> electrocatalyst exhibits the small overpotentials of 218 and 286 mV at current density of 10 mA cm<sup>-2</sup> in acid and neutral media, respectively. Accordingly, the Tafel slopes are 94 and 128 mV dec<sup>-1</sup> in acid and basic media. The results suggest the great potential of all pH hydrogen evolution for Co-MoS<sub>2</sub>/Mo<sub>2</sub>CT<sub>x</sub> hybrids. In addition, the Co-MoS<sub>2</sub>/Mo<sub>2</sub>CT<sub>x</sub> electrocatalyst exhibits much better alkaline HER activity than acidic HER activity, suggesting the enhanced HER activity of Co-MoS<sub>2</sub>/Mo<sub>2</sub>CT<sub>x</sub> catalyst in alkaline media is mainly attributed to the initially accelerated water dissociation, rather than the hydrogen adsorption properties.

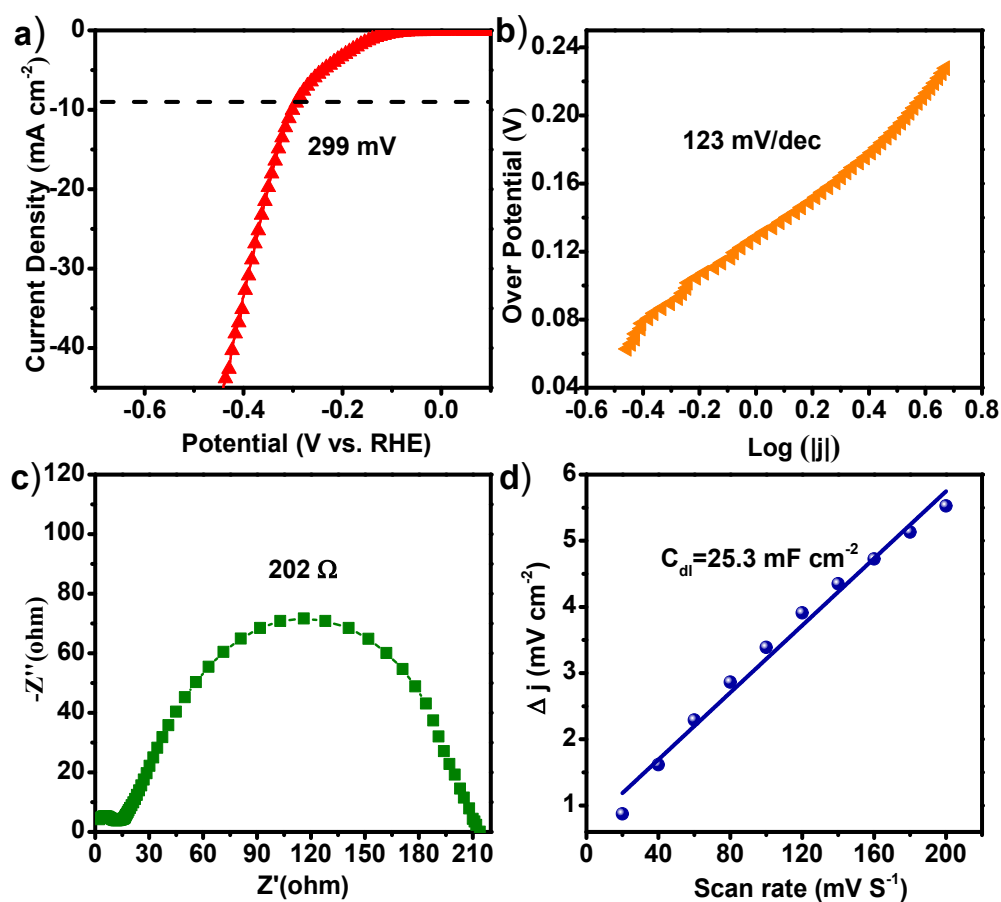

**Figure S9** a) Polarization curves of Co-MoS<sub>2</sub>/Mo<sub>2</sub>Ga<sub>2</sub>C catalyst at a scan rate of 5 mV s<sup>-1</sup> in 1 M KOH; b) Tafel plots of Co-MoS<sub>2</sub>/Mo<sub>2</sub>Ga<sub>2</sub>C catalyst; c) EIS spectrum of Co-MoS<sub>2</sub>/Mo<sub>2</sub>Ga<sub>2</sub>C catalyst at  $\eta = 200$  mV; d) capacitive current at 0.15 V as a function of scan rates (20 to 200 mV s<sup>-1</sup>) for Co-MoS<sub>2</sub>/Mo<sub>2</sub>Ga<sub>2</sub>C catalyst.

In view of the effect of etching by HF solution, the HER performance of Co-MoS<sub>2</sub>/Mo<sub>2</sub>Ga<sub>2</sub>C catalyst was evaluated, and the results are shown in **Figure S9**. It suggests Co-MoS<sub>2</sub>/Mo<sub>2</sub>Ga<sub>2</sub>C exhibits lower HER activity than Co-MoS<sub>2</sub>/Mo<sub>2</sub>CT<sub>x</sub> catalyst.

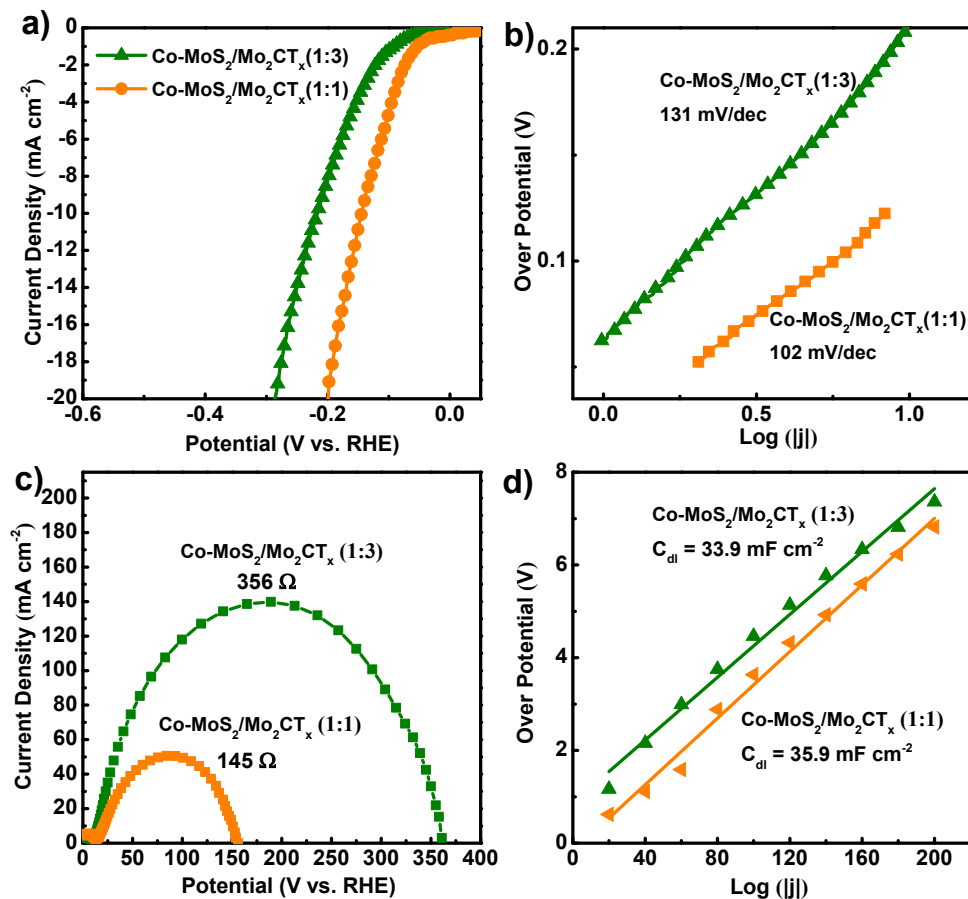

**Figure S10** a) Polarization curves, b) Tafel plots, c) EIS spectra and d) capacitive current at 0.15 V as a function of scan rates (20 to 200  $\text{mV s}^{-1}$ ) of Co-MoS<sub>2</sub>/Mo<sub>2</sub>CT<sub>x</sub> catalyst at different ATTM/Mo<sub>2</sub>CT<sub>x</sub> mass ratios.

The HER performance of Co-MoS<sub>2</sub>/Mo<sub>2</sub>CT<sub>x</sub> strongly depends on ATTM/Mo<sub>2</sub>CT<sub>x</sub> mass ratios. The ATTM/Mo<sub>2</sub>CT<sub>x</sub> MXene mass ratio of 3:1 described in manuscript displays higher HER activity than ATTM/Mo<sub>2</sub>CT<sub>x</sub> MXene mass ratio of 1:1 and 1:3.

**Table S1** A comparison of Co-MoS<sub>2</sub>/Mo<sub>2</sub>CT<sub>x</sub> electrocatalyst with recently reported non-noble metal catalysts in HER performance (1M KOH).

| Catalysts                                                 | Overpotential at j =<br>10 mA cm <sup>-2</sup> (mV) | Tafel slope<br>(mV dec <sup>-1</sup> ) | References                                              | Cites |
|-----------------------------------------------------------|-----------------------------------------------------|----------------------------------------|---------------------------------------------------------|-------|
| <b>Co-MoS<sub>2</sub>/Mo<sub>2</sub>CT<sub>x</sub></b>    | <b>112</b>                                          | <b>82</b>                              | <b>This work</b>                                        |       |
| Ni/Mo <sub>2</sub> C-PC                                   | 179                                                 | 101                                    | <i>Chem. Sci.</i> , 2017, <b>8</b> , 968                | 1     |
| MoS <sub>2</sub> /Ti <sub>3</sub> C <sub>2</sub> -MXene@C | 135                                                 | 45                                     | <i>Adv. Mater.</i> , 2017, <b>29</b> , 1607017          | 2     |
| Mo <sub>2</sub> C-C                                       | 149                                                 | 66                                     | <i>Nano Energy</i> , 2017, <b>32</b> , 511–519          | 3     |
| Cu@NiFe LDH                                               | 116                                                 | 58.9                                   | <i>Energy Environ. Sci.</i> , 2017, <b>10</b> , 1820    | 4     |
| Co-MoS <sub>2</sub>                                       | 163                                                 | 158                                    | <i>Energy Environ. Sci.</i> ,2016, <b>9</b> , 2789      | 5     |
| CoMoO-S/NF                                                | 134                                                 | 87                                     | <i>J. Catal.</i> , 2018, <b>361</b> , 204–213           | 6     |
| MoSSe                                                     | 140                                                 | 40                                     | <i>Adv. Mater.</i> , 2018, <b>30</b> , 1705509          | 7     |
| NC@CuCo <sub>2</sub> N <sub>x</sub> /CF                   | 105                                                 | 76                                     | <i>Adv. Funct. Mater.</i> , 2017, <b>27</b> , 1704169   | 8     |
| Ti <sub>2</sub> CT <sub>x</sub> nanosheets                | 170                                                 | 100                                    | <i>Nano Energy</i> , 2018, <b>47</b> , 512–518          | 9     |
| NiCu@C-1                                                  | 74                                                  | 94.5                                   | <i>Adv. Energy Mater.</i> , 2018, <b>8</b> , 1701759    | 10    |
| CuCoO-NWs                                                 | 140                                                 | 108                                    | <i>Adv. Funct. Mater.</i> , 2016, <b>26</b> , 8555–8561 | 11    |
| CoP@NC-NG                                                 | 155                                                 | 68.6                                   | <i>Small</i> , 2017, <b>14</b> ,702895                  | 12    |
| CoSe <sub>2</sub>                                         | 200                                                 | 85                                     | <i>Adv. Mater.</i> , 2016, <b>28</b> , 7527             | 13    |
| R-MoS <sub>2</sub> @NF                                    | 71                                                  | 100                                    | <i>Adv. Mater.</i> , 2018, <b>30</b> , 1707105          | 14    |
| SWCNTs/MoSe <sub>2</sub>                                  | 170                                                 | 67                                     | <i>Adv. Energy Mater.</i> , 2018, <b>8</b> , 1703212    | 15    |

## Supplementary References

1. Z. Y. Yu, Y. Duan, M. R. Gao, C. C. Lang, Y. R. Zheng and S. H. Yu, *Chem Sci*, 2017, **8**, 968-973.
2. X. Wu, Z. Wang, M. Yu, L. Xiu and J. Qiu, *Adv. Mater.*, 2017, **29**, 1607017.
3. Z. Wu, J. Wang, R. Liu, K. Xia, C. Xuan, J. Guo, W. Lei and D. Wang, *Nano Energy*, 2017, **32**, 511-519.
4. L. Yu, H. Zhou, J. Sun, F. Qin, F. Yu, J. Bao, Y. Yu, S. Chen and Z. Ren, *Energy Environ. Sci.*, 2017, **10**, 1820-1827.
5. J. Zhang, T. Wang, P. Liu, S. Liu, R. Dong, X. Zhuang, M. Chen and X. Feng, *Energy Environ. Sci.*, 2016, **9**, 2789-2793.
6. Z.-Z. Liu, X. Shang, B. Dong and Chai, Yong-Ming, *J. Catal.*, 2018, **361** 204-213.
7. C. Tan, Z. Luo, A. Chaturvedi, Y. Cai, Y. Du, Y. Gong, Y. Huang, Z. Lai, X. Zhang, L. Zheng, X. Qi, M. H. Goh, J. Wang, S. Han, X. J. Wu, L. Gu, C. Kloc and H. Zhang, *Adv. Mater.*, 2018, **30**, 1705509.
8. J. Zheng, X. Chen, X. Zhong, S. Li, T. Liu, G. Zhuang, X. Li, S. Deng, D. Mei and J.-G. Wang, *Adv. Funct. Mater.*, 2018, **27**, 1704169.
9. S. Li, P. Tuo, J. Xie, X. Zhang, J. Xu, J. Bao, B. Pan and Y. Xie, *Nano Energy*, 2018, **47**, 512-518.
10. Y. Shen, Y. Zhou, D. Wang, X. Wu, J. Li and J. Xi, *Adv. Energy Mater.*, 2018, **8**, 1701759.
11. M. Kuang, P. Han, Q. Wang, J. Li and G. Zheng, *Adv. Funct. Mater.*, 2016, **26**, 8555-8561.
12. J. Ma, M. Wang, G. Lei, G. Zhang, F. Zhang, W. Peng, X. Fan and Y. Li, *Small*, 2018, **14**, 1702895.
13. P. Chen, K. Xu, S. Tao, T. Zhou, Y. Tong, H. Ding, L. Zhang, W. Chu, C. Wu and Y. Xie, *Adv. Mater.*, 2016, **28**, 7527-7532.
14. M. A. R. Anjum, H. Y. Jeong, M. H. Lee, H. S. Shin and J. S. Lee, *Adv. Mater.*, 2018, **30**, 1707105.
15. L. Najafi, S. Bellani, R. Oropesa-Nuñez, A. Ansaldo, M. Prato, A. E. Del Rio Castillo and F. Bonaccorso, *Adv. Energy Mater.*, 2018, **8**, 1703212.
